# Supplementary material for: Utilizing Synergistic Potential of Mitochondria-Targeting Drugs for Leukemia Therapy
Source: PubMed Central journal article supplement (PMC7146088; doi:10.3389/fonc.2020.00435), 2020-04-03
Supplement: Table_1.pdf [file Table_1.pdf]

## *Supplementary Material*

### Supplementary Tables

**Table S1. List of cell lines included in the study.**

| Cell line | Cell line origin | Disease                      | Age | Sex | Ploidy                                                          | Genetic mutations / rearrangements                                                             |
|-----------|------------------|------------------------------|-----|-----|-----------------------------------------------------------------|------------------------------------------------------------------------------------------------|
| OCI-AML2  | Peripheral blood | Acute myeloid leukemia       | 65  | M   | Hyperdiploid 48(43-49)                                          | <i>DNMT3A</i> [PMID: 21904384]                                                                 |
| MOLM-13   | Peripheral blood | Acute myeloid leukemia       | 20  | M   | Hyperdiploid 51(48-52)                                          | FLT3-ITD <sup>1</sup> , CBL deltaExon8 mutant, <i>MLL-AF9</i> fusion [PMID: 12529668; 9305600] |
| K-562     | Bone marrow      | Chronic myelogenous leukemia | 53  | F   | Triploid                                                        | <i>CDKN2A</i> , <i>TP53</i> [PMID 17088437], BCR/ABL fusion                                    |
| KU812     | Peripheral blood | Chronic myelogenous leukemia | 38  | M   | Polyploid 58                                                    | Ph1 (Philadelphia) chromosome [PMID 3858609]                                                   |
| CCRF-CEM  | Peripheral blood | Acute lymphoblastic leukemia | 4   | F   | Aneuploid (modal number = 47; range = 41 to 95)                 | <i>CDKN2A</i> , <i>TP53</i> , <i>KRAS</i> , <i>PTEN</i> , <i>FLT3</i> [PMID 17088437]          |
| MOLT-4    | Peripheral blood | Acute lymphoblastic leukemia | 19  | M   | Hypertetra-ploid (modal chromosome number - 95 in 24% of cells) | <i>CDKN2A</i> , <i>TP53</i> , <i>NRAS</i> , <i>PTEN</i> [PMID 17088437]                        |

<sup>1</sup> internal tandem duplication

**Table S2. Characteristics of patients whose AML samples were used in the study.**

| N   | age | sex | WB C | % blast | Pretreatment                                                                                        | Mutation status: gene mutations/ genetic rearrangements | Karyotype                                                                                                                                                                                                                                                                     |
|-----|-----|-----|------|---------|-----------------------------------------------------------------------------------------------------|---------------------------------------------------------|-------------------------------------------------------------------------------------------------------------------------------------------------------------------------------------------------------------------------------------------------------------------------------|
| 1.  | 52  | F   | 8.7  | 84%     | Nivolumab<br>Azacitidine<br>Ipilimumab                                                              | NF1; SUZ12;<br>TP53                                     | 41,XX,-4,add(5)(q11.2), add(6)(p25),-7,+8, der(11)dup(11)(q13q25)dup(11)(q25q13),-12,-17,-18,-21[7]/41~42,idem,add(13)(q34),-14,+mar[cp12]/51,XX,+3,add(5)(q11.2),+6,add(6)(p25)x2,-7,+8,+8,+10,+11,der(11)dup(11)(q13q25)dup(11)(q25q13),-12,add(13)(q34),+14,+15,-18,-21[1] |
| 2.  | 36  | F   | 22.1 | 14%     | Cytarabine<br>Hydroxyurea                                                                           | ASXL, FLT3,<br>NRAS, RUNX1,<br>PHF6                     | 46, XX                                                                                                                                                                                                                                                                        |
| 3.  | 66  | M   | 18.6 | 70%     | Hydroxyurea                                                                                         | PML/RARA                                                | 46, XY                                                                                                                                                                                                                                                                        |
| 4.  | 48  | F   | 13.4 | 97%     | Decitabine<br>Venetoclax<br>Quizartinib                                                             | BCOR,PM1,FLT3,<br>WT1                                   | 46, XX                                                                                                                                                                                                                                                                        |
| 5.  | 64  | M   | 8.7  | 39%     | AMG 330<br>Hydroxyurea                                                                              | CREBBP, PHF6,<br>RUNX1, TET2                            | 46,XY,t(7;10)(q32;q22)[18]/46,XY[2]                                                                                                                                                                                                                                           |
| 6.  | 70  | M   | 11.2 | 16%     | Hydroxyurea,<br>Cytarabine                                                                          | SRFS2                                                   | 46, XY                                                                                                                                                                                                                                                                        |
| 7.  | 53  | F   | 22.7 | 89%     | Hydroxyurea,<br>2014-0057<br>Hu8F4                                                                  | FLT3, TET2                                              | 48,XX,+8,inv(16)(p13.1q22),+22[19]/48,idem,t(12;22)(p13;q11.2)[1]                                                                                                                                                                                                             |
| 8.  | 30  | M   | 2.4  | 76%     | Azacitidine<br>Hydroxyurea                                                                          | EED, GATA2,<br>PTPN11, RUNX1                            | 45,XY,t(3;3)(q21;q26.2),del(6)(q12),-7[20]                                                                                                                                                                                                                                    |
| 9.  | 25  | M   | 44.4 | 96%     | Hydroxyurea,<br>Pentamidine,<br>Fludarabine,<br>IDArubicin<br>with<br>CYTarabine<br>plus Venetoclax | PTPN11                                                  | 46,XY,+8,-16,der(21)t(16;21)(p11.2;q22)[7]/46,idem,add(1)(p36.1),add(4)(q21),t(4;8)(p15.2;q13),del(17)(p11.2),add(18)(q23),+mar[cp11]/46,XX[2]                                                                                                                                |
| 10. | 64  | M   | 18.2 | 62%     | Cytarabine                                                                                          | NRAS,<br>PRPF40B,<br>PTPN11                             | 46,XY,t(6;11)(q27;23)[18]/44~46,idem,+1,der(1;15)(q10;q10)[cp2]                                                                                                                                                                                                               |
| 11. | 74  | F   | 8.3  | 94%     | IMGN632 and<br>AzaCITIDine,<br>Hydroxyurea,<br>azaCITIDine,<br>Avelumab, and<br>Venetoclax          | GATA1, RAD21,<br>TP53                                   | 44,XX,dic(5;17)(q11.2;p11.2),add(7)(p12),add(8)(p12),dic(13;14)(p13;p12),-19,+mar[16]/43~45,idem,+mar[cp3]/46,XX[1]                                                                                                                                                           |
| 12. | 33  | M   | 22.5 | 98%     | PLX51107 +<br>azaCITIDine                                                                           | BCOR, ETV6,<br>GATA2, IKZF1,<br>NRAS, SF3B1,<br>WT1     | 45,X,-Y,inv(3)(q21q26.2)[1]/45,idem,del(6)(q21q25),add(20)(q11.2)[18]/45,X,-Y,der(1)t(1;3)(q42;p21),der(3)t(1;3)inv(3)(q21q26.2)[1]                                                                                                                                           |
| 13. | 61  | M   | 5.9  | 82%     | None                                                                                                | TP53, ZRSR2                                             | 45,XY,del(5)(q15q33),-7,add(10)(q24),+11,-14,-16,+add(17)(q25),del(17)(p11.1),del(17)(p                                                                                                                                                                                       |

|     |    |   |      |      |                                                                            |                                                            |                                                                                                                                                                                                                          |
|-----|----|---|------|------|----------------------------------------------------------------------------|------------------------------------------------------------|--------------------------------------------------------------------------------------------------------------------------------------------------------------------------------------------------------------------------|
|     |    |   |      |      |                                                                            |                                                            | 11.2),-<br>18,+21,add(22)(q13)[11]/46,XY[9]                                                                                                                                                                              |
| 14. | 74 | M | 4.9  | 14%  | DAUNOrubicin<br>-CYTarabine<br>liposomal<br>(CPX-351) +<br>Gemtuzumab      | ASXL, IDH1,<br>NRAS, RUNX1,<br>SRSF2, STAG2,<br>TERT, TET2 | 47,XY,+8[17]/46,XY[3]                                                                                                                                                                                                    |
| 15. | 54 | F | 25.8 | 87%  | Fludarabine<br>Cytarabine                                                  | DNMT3A, NF1,<br>TET2, TP53                                 | 42,XX,del(5)(q13q33),-7,-14,-17,-<br>18[2]/41~42,idem,-X,del(3)(q26),-<br>5,del(6)(q13q23),-<br>11,add(11)(q25),add(12)(p11.2),-15,-<br>16,add(16)(q24),add(19)(q12),del(20)(q11.<br>2q13.1),+22,+1~5mar[cp17]//46,XY[1] |
| 16. | 82 | M | 66.8 | 100% | Hydroxyurea<br><br>Azacitidine                                             | CBL, EXH2,<br>JAK2, SF3B1,<br>SMC3, TET2                   | 46,XY[20]                                                                                                                                                                                                                |
| 17. | 74 | F | 9.3  | 73%  | IMGN632 and<br>AzaCITIDine,<br>azaCITIDine,<br>Avelumab, and<br>Venetoclax | GATA1, RAD21,<br>TP53                                      | 44,XX,dic(5;17)(q11.2;p11.2),add(7)(p12)<br>,add(8)(p12),dic(13;14)(p13;p12),-<br>19,+mar[16]/43~45,idem,+mar[cp3]/46,X<br>X[1]                                                                                          |
| 18. | 76 | M | 1.7  | 69%  | None<br><br>Past: VEN +<br>IMGN                                            | KRAS, TP53                                                 | 38~47<2n>,XY,del(5)(q13),-<br>7,+8,+11,add(11)(p15),-<br>16,der(16)t(1;16)(p13;q13),-18,+19,-<br>22,+mar[cp18]/46,XY[2]                                                                                                  |

**Table S3. Drugs used for screening of mitocan-based combinations against AML cell lines.**

| Mitocans                                                                         | Tyrosine Kinase Inhibitors                         | Anti-microtubule           | Anti-glycolytic                                                                                         |
|----------------------------------------------------------------------------------|----------------------------------------------------|----------------------------|---------------------------------------------------------------------------------------------------------|
| OXPHOS inhibitors: rotenone <sup>2</sup> , IACS-010759 <sup>1</sup>              | Midostaurin <sup>1</sup><br>Dasatinib <sup>1</sup> | Vinorelbine <sup>1,2</sup> | 2-deoxy-D-glucose (2-DG) <sup>2</sup><br>3-bromopyruvate (3-BP) <sup>2</sup><br>Lonidamine <sup>2</sup> |
| DNA-targeted: cytarabine <sup>1</sup> , etoposide <sup>1</sup>                   |                                                    |                            |                                                                                                         |
| Pro-apoptotic: ABT-199 <sup>1</sup>                                              |                                                    |                            |                                                                                                         |
| Uncouplers: carbonyl cyanide <i>m</i> -chlorophenylhydrazone (CCCP) <sup>2</sup> |                                                    |                            |                                                                                                         |

<sup>1</sup>Drugs being used in regimens against AML/considered as promising by clinical trials;

<sup>2</sup>Drugs having selectivity against leukemia cells compared to normal blood cells as defined by preliminary cytotoxicity assays.

**Table S4. Concentrations of drugs used for building combination landscapes in cell lines\*.**

| Drug                                  | MOLM-13                           | OCI-AML2                          | CCRF-CEM                           | MOLT-4                              | K-562                               | KU812                               |
|---------------------------------------|-----------------------------------|-----------------------------------|------------------------------------|-------------------------------------|-------------------------------------|-------------------------------------|
| Rotenone (RT), $\mu\text{M}$          | 0, 6.3, 12.5, 25, 50 <sup>1</sup> | 0, 6.3, 12.5, 25, 50 <sup>1</sup> | 0, 6.3, 12.5, 25, 50 <sup>1</sup>  | 0, 0.1, 0.25, 0.5, 1 <sup>1</sup>   | 0, 6.3, 12.5, 25, 50 <sup>2</sup>   | 0, 6.3, 12.5, 25, 50 <sup>2</sup>   |
| IACS-010759, $\mu\text{M}$            | 0, 6.3, 12.5, 25, 50 <sup>3</sup> | 0, 6.3, 12.5, 25, 50 <sup>3</sup> | 0, 6.3, 12.5, 25, 50 <sup>3</sup>  | 0, 0.8, 1.6, 3.2, 6.3 <sup>1</sup>  | 0, 6.3, 12.5, 25, 50 <sup>3</sup>   | 0, 6.3, 12.5, 25, 50 <sup>3</sup>   |
| Cytarabine (ara-C), $\mu\text{M}$     | 0, 50, 100, 200, 400 <sup>3</sup> | 0, 50, 100, 200, 400 <sup>3</sup> | N/A <sup>4</sup>                   | N/A                                 | N/A                                 | N/A                                 |
| Etoposide (ET), $\mu\text{M}$         | 0, 25, 50, 100, 200 <sup>3</sup>  | 0, 12.5, 25, 50, 100 <sup>1</sup> | N/A                                | N/A                                 | N/A                                 | N/A                                 |
| ABT-199, $\mu\text{M}$                | 0, 1.3, 2.5, 5, 10 <sup>1</sup>   | 0, 1.3, 2.5, 5, 10 <sup>1</sup>   | 0, 1.3, 2.5, 5, 10 <sup>1</sup>    | 0, 0.05, 0.1, 0.2, 0.4 <sup>1</sup> | 0, 6.3, 12.5, 25, 50 <sup>2</sup>   | 0, 6.3, 12.5, 25, 50 <sup>2</sup>   |
| CCCP, $\mu\text{M}$                   | 0, 25, 50, 100, 200 <sup>1</sup>  | 0, 25, 50, 100, 200 <sup>1</sup>  | 0, 2.5, 5, 10, 20 <sup>1</sup>     | 0, 0.6, 1.3, 2.5, 5 <sup>1</sup>    | 0, 18.8, 37.5, 75, 150 <sup>1</sup> | 0, 18.8, 37.5, 75, 150 <sup>1</sup> |
| Midostaurin (MID), $\mu\text{M}$      | 0, 1.3, 2.5, 5, 10 <sup>2</sup>   | 0, 1.3, 2.5, 5, 10 <sup>2</sup>   | N/A                                | N/A                                 | N/A                                 | N/A                                 |
| Dasatinib (DAS), $\mu\text{M}$        | 0, 6.3, 12.5, 25, 50 <sup>1</sup> | 0, 6.3, 12.5, 25, 50 <sup>1</sup> | 0, 7.5, 15, 30, 60 <sup>1</sup>    | 0, 7.5, 15, 30, 60 <sup>1</sup>     | 0, 15, 30, 60, 120 <sup>1</sup>     | 0, 15, 30, 60, 120 <sup>1</sup>     |
| Vinorelbine (VIN), $\mu\text{M}$      | 0, 1.3, 2.5, 5, 10 <sup>1</sup>   | 0, 2.5, 5, 10, 20 <sup>1</sup>    | 0, 3.1, 6.3, 12.5, 25 <sup>1</sup> | 0, 3.1, 6.3, 12.5, 25 <sup>1</sup>  | 0, 5, 10, 20, 40 <sup>1</sup>       | 0, 5, 10, 20, 40 <sup>1</sup>       |
| 2-deoxy-D-glucose (2-DG), mM          | 0, 6.3, 12.5, 25, 50 <sup>1</sup> | 0, 6.3, 12.5, 25, 50 <sup>1</sup> | 0, 25, 50, 100, 200 <sup>1</sup>   | 0, 25, 50, 100, 200 <sup>1</sup>    | 0, 50, 100, 200, 400 <sup>2</sup>   | 0, 50, 100, 200, 400 <sup>2</sup>   |
| 3-bromopyruvate (3-BP), $\mu\text{M}$ | 0, 1.3, 2.5, 5, 10 <sup>1</sup>   | 0, 2.5, 5, 10, 20 <sup>1</sup>    | N/A                                | N/A                                 | N/A                                 | N/A                                 |
| Lonidamine (LND), $\mu\text{M}$       | 0, 25, 50, 100, 200 <sup>2</sup>  | 0, 25, 50, 100, 200 <sup>2</sup>  | 0, 25, 50, 100, 200 <sup>2</sup>   | 0, 6.3, 12.5, 25, 50 <sup>1</sup>   | 0, 25, 50, 100, 200 <sup>2</sup>    | 0, 25, 50, 100, 200 <sup>2</sup>    |

Maximal dose of single drug used for combination landscapes was defined by preliminary cytotoxicity assays:

<sup>1</sup>dose resulting at 30-50% survival for at least one AML cell line from two tested; 30-50% survival for ALL or CML cell line

<sup>2</sup>dose corresponding to the limit of drug (4x) solubility in test media

<sup>3</sup>dose corresponding to the limit of DMSO cytotoxicity

<sup>4</sup>N/A defines drugs that have not been used against ALL/CML cell lines

\*The same range of 2-fold serial dilutions was used within same type of leukemia, e.g., 0, 0.8, 1.6, 3.2, 6.3  $\mu\text{M}$  IACS-010759 for MOLT-4, and 0, 6.3, 12.5, 25, 50  $\mu\text{M}$  IACS-010759 for CCRF-CEM.

**Table S5. Concentrations of drugs used for building combination landscapes in primary AML cells.**

| Drug                       | AML 1                               | AML 2                               | AML 3                               | AML 4                               | AML 5                               | AML 6                               | AML 7                                  | AML 8                                  | AML 9                                  | AML 10                                      | AML 11                                 | AML 12                                 |
|----------------------------|-------------------------------------|-------------------------------------|-------------------------------------|-------------------------------------|-------------------------------------|-------------------------------------|----------------------------------------|----------------------------------------|----------------------------------------|---------------------------------------------|----------------------------------------|----------------------------------------|
| IACS-010759, $\mu\text{M}$ | 0, 6.3, 12.5, 25, 50 <sup>3</sup>   | 0, 6.3, 12.5, 25, 50 <sup>3</sup>   | 0, 6.3, 12.5, 25, 50 <sup>3</sup>   | 0, 6.3, 12.5, 25, 50 <sup>3</sup>   | 0, 6.3, 12.5, 25, 50 <sup>3</sup>   | 0, 6.3, 12.5, 25, 50 <sup>3</sup>   | 0, 6.3, 12.5, 25, 50 <sup>3</sup>      | 0, 3.1, 6.3, 12.5, 25, 50 <sup>3</sup> | 0, 3.1, 6.3, 12.5, 25, 50 <sup>3</sup> | 0, 3.1, 6.3, 12.5, 25, 50 <sup>3</sup>      | 0, 3.1, 6.3, 12.5, 25, 50 <sup>3</sup> | 0, 3.1, 6.3, 12.5, 25, 50 <sup>3</sup> |
| VIN, $\mu\text{M}$         | 0, 6.3, 12.5, 25, 50 <sup>1</sup>   | 0, 3.1, 6.3, 12.5, 25 <sup>1</sup>  | 0, 12.5, 25, 50, 100 <sup>1</sup>   | 0, 6.3, 12.5, 25, 50 <sup>1</sup>   | 0, 3.1, 6.3, 12.5, 25 <sup>1</sup>  | 0, 3.1, 6.3, 12.5, 25 <sup>1</sup>  | 0, 3.1, 6.3, 12.5, 25 <sup>1</sup>     | 0, 3.1, 6.3, 12.5, 25 <sup>1</sup>     | 0, 6.3, 12.5, 25, 50, 100 <sup>1</sup> | 0, 3.1, 6.3, 12.5, 25, 50, 100 <sup>1</sup> | 0, 6.3, 12.5, 25, 50, 100 <sup>1</sup> | 0, 12.5, 25, 50, 100 <sup>1</sup>      |
| RT, $\mu\text{M}$          | 0, 6.3, 12.5, 25, 50 <sup>2</sup>   | 0, 6.3, 12.5, 25, 50 <sup>2</sup>   | 0, 6.3, 12.5, 25, 50 <sup>2</sup>   | 0, 6.3, 12.5, 25, 50 <sup>2</sup>   | 0, 6.3, 12.5, 25, 50 <sup>2</sup>   | 0, 6.3, 12.5, 25, 50 <sup>2</sup>   | 0, 6.3, 12.5, 25, 50 <sup>2</sup>      | 0, 6.3, 12.5, 25, 50 <sup>2</sup>      | 0, 6.3, 12.5, 25, 50 <sup>2</sup>      | 0, 6.3, 12.5, 25, 50 <sup>2</sup>           | 0, 6.3, 12.5, 25, 50 <sup>2</sup>      | 0, 6.3, 12.5, 25, 50 <sup>2</sup>      |
| 2-DG, mM                   | 0, 37.5, 75, 150, 300 <sup>1</sup>  | 0, 37.5, 75, 150, 300 <sup>1</sup>  | 0, 50, 100, 200, 400 <sup>1,2</sup> | 0, 50, 100, 200, 400 <sup>2</sup>   | 0, 50, 100, 200, 400 <sup>2</sup>   | 0, 50, 100, 200, 400 <sup>2</sup>   | 0, 50, 100, 200, 400 <sup>2</sup>      | 0, 50, 100, 200, 400 <sup>1,2</sup>    | 0, 50, 100, 200, 400 <sup>1,2</sup>    | 0, 50, 100, 12.5, 25, 50, 100 <sup>1</sup>  | 0, 50, 100, 200, 400 <sup>2</sup>      | 0, 50, 100, 200, 400 <sup>1,2</sup>    |
| CCCP, $\mu\text{M}$        | 0, 6.3, 12.5, 25, 50 <sup>1</sup>   | 0, 6.3, 12.5, 25, 50 <sup>1</sup>   | 0, 12.5, 25, 50, 100 <sup>1</sup>   | 0, 12.5, 25, 50, 100 <sup>1</sup>   | 0, 3.1, 6.3, 12.5, 25 <sup>1</sup>  | 0, 12.5, 25, 50, 100 <sup>1</sup>   | 0, 6.3, 12.5, 25, 50, 100 <sup>1</sup> | 0, 6.3, 12.5, 25, 50, 100 <sup>1</sup> | 0, 25, 50, 100, 200 <sup>1</sup>       | 0, 25, 50, 100, 200 <sup>1</sup>            | 0, 25, 50, 100, 200 <sup>1</sup>       | 0, 25, 50, 100, 200 <sup>1</sup>       |
| DAS, $\mu\text{M}$         | 0, 9.4, 18.8, 37.5, 75 <sup>1</sup> | 0, 9.4, 18.8, 37.5, 75 <sup>1</sup> | 0, 6.3, 12.5, 25, 50 <sup>1</sup>   | 0, 12.5, 25, 50, 100 <sup>1</sup>   | 0, 6.3, 12.5, 25, 50 <sup>1</sup>   | 0, 6.3, 12.5, 25, 50 <sup>1</sup>   | 0, 12.5, 25, 50, 100 <sup>1</sup>      | 0, 6.3, 12.5, 25, 50, 100 <sup>1</sup> | 0, 6.3, 12.5, 25, 50, 100 <sup>1</sup> | 0, 6.3, 12.5, 25, 50, 100 <sup>1</sup>      | 0, 12.5, 25, 50, 100 <sup>1</sup>      | 0, 6.3, 12.5, 25, 50, 100 <sup>1</sup> |
| ABT-199, $\mu\text{M}$     | 0, 6.3, 12.5, 25, 50 <sup>1,2</sup> | 0, 6.3, 12.5, 25, 50 <sup>1,2</sup> | 0, 6.3, 12.5, 25, 50 <sup>1,2</sup> | 0, 6.3, 12.5, 25, 50 <sup>1,2</sup> | 0, 1.6, 3.1, 6.3, 12.5 <sup>1</sup> | 0, 1.6, 3.1, 6.3, 12.5 <sup>1</sup> | 0, 0.8, 1.6, 3.2, 6.3 <sup>1</sup>     | 0, 0.8, 1.6, 3.2, 6.3 <sup>1</sup>     | 0, 6.3, 12.5, 25, 50 <sup>1,2</sup>    | 0, 6.3, 12.5, 25, 50 <sup>1,2</sup>         | 0, 6.3, 12.5, 25, 50 <sup>2</sup>      | 0, 6.3, 12.5, 25, 50 <sup>2</sup>      |
| LND, $\mu\text{M}$         | 0, 25, 50, 100, 200 <sup>2</sup>    | 0, 25, 50, 100, 200 <sup>2</sup>    | 0, 25, 50, 100, 200 <sup>2</sup>    | 0, 25, 50, 100, 200 <sup>2</sup>    | 0, 25, 50, 100, 200 <sup>2</sup>    | 0, 12.5, 25, 50, 100 <sup>1</sup>   | 0, 25, 50, 100, 200 <sup>1,2</sup>     | 0, 25, 50, 100, 200 <sup>2</sup>       | 0, 12.5, 25, 50, 100, 200 <sup>2</sup> | 0, 25, 50, 100, 200 <sup>2</sup>            | 0, 25, 50, 100, 200 <sup>1,2</sup>     | 0, 25, 50, 100, 200 <sup>1,2</sup>     |

Maximal dose of single drug used for combination landscapes was defined by preliminary cytotoxicity assays:

<sup>1</sup>dose resulting at 30-50% survival

<sup>2</sup>dose corresponding to the limit of drug (4x) solubility in test media

<sup>3</sup>dose corresponding to the limit of DMSO cytotoxicity

**Table S6. Example of calculation of maximal difference in survival: CCCP/dasatinib (CCCP/DAS) combination.**

| Dose <sup>1</sup>          | Viability <sup>2</sup> ,<br>MOLM-13,<br>mean<br>(1) | Viability <sup>2</sup> ,<br>OCI-AML2,<br>mean<br>(2) | Viability <sup>2</sup> ,<br>normal<br>PBMC,<br>mean<br>(3) | Difference<br>in survival,<br>MOLM-13,<br>(4)=(3)-(1) | Difference<br>in survival,<br>OCI-AML2,<br>(5)=(3)-(2) | Average<br>difference in<br>survival,<br>(6)=((4)+(5))/2, |
|----------------------------|-----------------------------------------------------|------------------------------------------------------|------------------------------------------------------------|-------------------------------------------------------|--------------------------------------------------------|-----------------------------------------------------------|
| CCCP 50 µM/DAS<br>25 µM    | 54.52%                                              | 66.98%                                               | 80.03%                                                     | 25.50%                                                | 13.05%                                                 | 19.28%                                                    |
| CCCP 100 µM/DAS<br>12.5 µM | 64.40%                                              | 65.10%                                               | 78.40%                                                     | 14.00%                                                | 13.30%                                                 | 13.65%                                                    |
| CCCP 100 µM/DAS<br>25 µM   | 67.46%                                              | 68.37%                                               | 79.89%                                                     | 12.43%                                                | 11.52%                                                 | 11.98%                                                    |
| CCCP 200 µM/DAS<br>25 µM   | 25.44%                                              | 38.63%                                               | 60.07%                                                     | 34.63%                                                | 21.44%                                                 | 28.03%                                                    |
| CCCP 200 µM/DAS<br>50 µM   | 6.41%                                               | 15.59%                                               | 64.23%                                                     | 57.82%                                                | 48.64%                                                 | <b>53.23%</b> <sup>3</sup>                                |

<sup>1</sup>Considered were only doses at which viability of PBMCs was significantly higher than that of both AML cell lines;

<sup>2</sup>Based on at least 3 independent biological replicates;

<sup>3</sup>Maximal difference in survival is highlighted in red.

**Table S7. Relationship between selectivity and synergy of 21 mitocan-based combinations.**

| Rank <sup>1</sup> | Dose of maximal selectivity          | Difference PBMC - MOLM13, survival, % | Difference PBMC - OCI-AML2, survival, % | Average difference in survival, % <sup>2</sup> | Difference PBMC - MOLM13, synergy coefficient, arbitrary units | Difference PBMC - OCI-AML2, synergy coefficient, arbitrary units | Average difference in synergy, arbitrary units <sup>3</sup> |
|-------------------|--------------------------------------|---------------------------------------|-----------------------------------------|------------------------------------------------|----------------------------------------------------------------|------------------------------------------------------------------|-------------------------------------------------------------|
| 1.                | IACS 25 $\mu$ M/VIN 10 $\mu$ M       | 80                                    | 80.5                                    | <b>80.3</b>                                    | -24.3                                                          | -25.8                                                            | -25.0                                                       |
| 2.                | RT 50 $\mu$ M/2-DG 50 mM             | 45.8                                  | 66.6                                    | <b>56.2</b>                                    | -21.0                                                          | -29.4                                                            | -25.2                                                       |
| 3.                | CCCP 200 $\mu$ M/DAS 50 $\mu$ M      | 59.7                                  | 50.5                                    | <b>55.1</b>                                    | -37.2                                                          | -32.4                                                            | -34.8                                                       |
| 4.                | ABT-199 1.3 $\mu$ M/LND 50 $\mu$ M   | 51.5                                  | 49.8                                    | <b>50.7</b>                                    | -12.4                                                          | -10.8                                                            | -11.6                                                       |
| 5.                | IACS 50 $\mu$ M/2-DG 50 mM           | 38.3                                  | 53.6                                    | 45.9                                           | -6.0                                                           | -14.3                                                            | -10.1                                                       |
| 6.                | RT 6.3 $\mu$ M/VIN 5 $\mu$ M         | 75.7                                  | 15.9                                    | 45.8                                           | -2.8                                                           | 0.4                                                              | -1.2                                                        |
| 7.                | RT 12.5 $\mu$ M/MID 1.3 $\mu$ M      | 51.5                                  | 32.6                                    | 42                                             | 1.3                                                            | -6.4                                                             | -2.5                                                        |
| 8.                | CCCP 200 $\mu$ M/2-DG 50 mM          | 55.8                                  | 16.9                                    | 36.4                                           | -10.4                                                          | 13.5                                                             | 1.6                                                         |
| 9.                | ABT-199 1.3 $\mu$ M/DAS 12.5 $\mu$ M | 41.9                                  | 29.6                                    | 35.8                                           | -8.3                                                           | -19.6                                                            | -13.9                                                       |
| 10.               | ET 25 $\mu$ M/LND 100 $\mu$ M        | 13.5                                  | 56.5                                    | 35                                             | -20.5                                                          | -41.5                                                            | -31.0                                                       |
| 11.               | RT 12.5 $\mu$ M/DAS 50 $\mu$ M       | 33.4                                  | 35.5                                    | 34.5                                           | 4.6                                                            | -7.4                                                             | -1.4                                                        |
| 12.               | Ara-C 50 $\mu$ M/MID 10 $\mu$ M      | 23.3                                  | 44.4                                    | 33.8                                           | -8.7                                                           | -24.9                                                            | -16.8                                                       |
| 13.               | IACS 25 $\mu$ M/DAS 50 $\mu$ M       | 25.2                                  | 41.9                                    | 33.5                                           | 17.2                                                           | 2.0                                                              | 9.6                                                         |
| 14.               | ET 50 $\mu$ M/DAS 50 $\mu$ M         | 32.9                                  | 31.4                                    | 32.2                                           | -1.3                                                           | -0.6                                                             | -1.0                                                        |
| 15.               | ABT-199 10 $\mu$ M/VIN 10 $\mu$ M    | 20                                    | 40.7                                    | 30.3                                           | -9.3                                                           | -34.9                                                            | -22.1                                                       |
| 16.               | CCCP 200 $\mu$ M/LND 200 $\mu$ M     | 23.8                                  | 26.4                                    | 25.1                                           | -34.3                                                          | -12.7                                                            | -23.5                                                       |
| 17.               | RT 12.5 $\mu$ M/LND 50 $\mu$ M       | 36.1                                  | 12.5                                    | 24.3                                           | -0.9                                                           | -6.1                                                             | -3.5                                                        |
| 18.               | ABT-199 10 $\mu$ M/3-BP 5 $\mu$ M    | 19.9                                  | 23                                      | 21.4                                           | -18.1                                                          | -35.9                                                            | -27.0                                                       |
| 19.               | IACS 12.5 $\mu$ M/MID 2.5            | 27.1                                  | 13.8                                    | 20.5                                           | 13.8                                                           | -4.6                                                             | 4.6                                                         |



|     |                                       |      |     |      |      |      |      |
|-----|---------------------------------------|------|-----|------|------|------|------|
|     | $\mu$ M                               |      |     |      |      |      |      |
| 20. | ABT-199 1.3<br>$\mu$ M/2-DG 25<br>mM  | 22.6 | 8.4 | 15.5 | -1.9 | -2.6 | -2.2 |
| 21. | CCCP 200<br>$\mu$ M/3-BP 5<br>$\mu$ M | 13.3 | 7   | 10.1 | -0.8 | 16.0 | 7.6  |

<sup>1</sup>Considered were only selective drug combinations (n = 21);

<sup>2</sup>Average between columns 3 and 4;

<sup>3</sup>Average between columns 6 and 7.

**Table S8. Changes\* in mitochondrial bioenergetic parameters after treatment with selected mitocan-based drug combinations (IACS-010759/vinorelbine, rotenone/2-DG, CCCP/dasatinib, ABT-199/lonidamine) in a panel of AML cells and normal PBMCs.**

| Drug combination | Bioenergetic parameter | MOLM-13              | AML 13                | AML 14                | AML 15               | AML 16               | AML 17               | AML 18                | PBMC                 |
|------------------|------------------------|----------------------|-----------------------|-----------------------|----------------------|----------------------|----------------------|-----------------------|----------------------|
| IACS/<br>VIN     | Basal OCR              | $p < 0.0001$<br>-64% | $p = 0.0236$<br>-35%  | NS                    | NS                   | $p = 0.0004$<br>-58% | $p < 0.0001$<br>-77% | NS                    | NS                   |
|                  | Maximal OCR            | $p < 0.0001$<br>-64% | $p = 0.0014$<br>-58%  | NS                    | $p = 0.0161$<br>-40% | $p < 0.0001$<br>-71% | $p < 0.0002$<br>-82% | NS                    | $p = 0.0001$<br>-71% |
|                  | ATP-linked OCR         | $p < 0.0001$<br>-70% | $p = 0.0112$<br>-82%  | NS                    | NS                   | $p < 0.0008$<br>-56% | $p = 0.0003$<br>-93% | $p = 0.0055$<br>-122% | $p = 0.0009$<br>-49% |
|                  | Proton leak            | NS                   | NSNS                  | NS                    | NS                   | $p = 0.0161$<br>-29% | NS                   | NS                    | NS                   |
|                  | Spare capacity         | $p = 0.0307$<br>-63% | $p = 0.0062$<br>-40%  | NS                    | NS                   | $p < 0.0001$<br>-73% | $p = 0.0116$<br>-88% | NS                    | $p = 0.0001$<br>-79% |
|                  | Coupling efficiency    | $p = 0.0015$<br>-21% | $p = 0.0134$<br>-38%  | NS                    | NS                   | NS                   | $p = 0.0005$<br>-73% | $p = 0.0491$<br>-175% | $p = 0.0009$<br>-41% |
|                  | ECAR                   | $p = 0.0032$<br>+33% | $p = 0.0008$<br>+234% | $p = 0.0001$<br>+138% | $p < 0.0001$<br>+61% | $p < 0.0001$<br>+75% | $p < 0.0001$<br>+97% | NS                    | $p = 0.0341$<br>+42% |
| RT/<br>2-DG      | Basal OCR              | $p = 0.0003$<br>-40% | NS                    | NS                    | NS                   | NS                   | NS                   | NS                    | NS                   |
|                  | Maximal OCR            | $p = 0.0069$<br>-36% | $p = 0.0203$<br>-35%  | NS                    | NS                   | NS                   | $p = 0.0454$<br>-34% | NS                    | NS                   |
|                  | ATP-linked OCR         | $p = 0.0011$<br>-41% | NSNS                  | NS                    | NS                   | NS                   | NS                   | $p < 0.0288$<br>-88%  | NS                   |
|                  | Proton leak            | NS                   | NS                    | NS                    | NS                   | NS                   | NS                   | NS                    | NS                   |
|                  | Spare capacity         | NS                   | $p = 0.0245$<br>-22%  | NS                    | NS                   | NS                   | NS                   | NS                    | NS                   |
|                  | Coupling efficiency    | NS                   | NS                    | NS                    | NS                   | NS                   | NS                   | NS                    | NS                   |
|                  | ECAR                   | $p < 0.0001$<br>+47% | $p = 0.0019$<br>+217% | $p = 0.0038$<br>+113% | $p < 0.0001$<br>+64% | $p < 0.0001$<br>+57% | $p = 0.0097$<br>+27% | NS                    | NS                   |
| CCCP/<br>DAS     | Basal OCR              | NS                   | NS                    | NS                    | NS                   | NS                   | $p = 0.0316$<br>+22% | NS                    | NS                   |

|                 |                     |    |                                          |    |                                            |                                         |    |                                         |                                          |
|-----------------|---------------------|----|------------------------------------------|----|--------------------------------------------|-----------------------------------------|----|-----------------------------------------|------------------------------------------|
|                 |                     |    |                                          |    |                                            |                                         |    |                                         |                                          |
|                 | Maximal OCR         | NS | <b><math>p = 0.0282</math><br/>+37%</b>  | NS | NS                                         | NS                                      | NS | NS                                      | NS                                       |
|                 | ATP-linked OCR      | NS | NS                                       | NS | NS                                         | NS                                      | NS | NS                                      | NS                                       |
|                 | Proton leak         | NS | NS                                       | NS | NS                                         | NS                                      | NS | NS                                      | <b><math>p = 0.0308</math><br/>+169%</b> |
|                 | Spare capacity      | NS | NS                                       | NS | NS                                         | NS                                      | NS | NS                                      | NS                                       |
|                 | Coupling efficiency | NS | NS                                       | NS | NS                                         | NS                                      | NS | NS                                      | <b><math>p = 0.0114</math><br/>-28%</b>  |
|                 | ECAR                | NS | <b><math>p = 0.0023</math><br/>+229%</b> | NS | NS                                         | NS                                      | NS | <b><math>p = 0.0047</math><br/>-21%</b> | <b><math>p = 0.0457</math><br/>+40%</b>  |
| ABT-199/<br>LND | Basal OCR           | NS | NS                                       | NS | NS                                         | NS                                      | NS | NS                                      | NS                                       |
|                 | Maximal OCR         | NS | NS                                       | NS | <b><math>p = 0.0161</math><br/>-39%</b>    | <b><math>p = 0.0329</math><br/>+29%</b> | NS | NS                                      | NS                                       |
|                 | ATP-linked OCR      | NS | NS                                       | NS | NS                                         | NS                                      | NS | NS                                      | NS                                       |
|                 | Proton leak         | NS | NS                                       | NS | NS                                         | NS                                      | NS | NS                                      | NS                                       |
|                 | Spare capacity      | NS | NS                                       | NS | <b><math>p = 0.048</math><br/>-39%</b>     | <b><math>p = 0.0235</math><br/>+35%</b> | NS | NS                                      | NS                                       |
|                 | Coupling efficiency | NS | NS                                       | NS | NS                                         | NS                                      | NS | NS                                      | <b><math>p = 0.0135</math><br/>-28%</b>  |
|                 | ECAR                | NS | NS                                       | NS | <b><math>p &lt; 0.0001</math><br/>-43%</b> | NS                                      | NS | NS                                      | NS                                       |

\*ANOVA with subsequent pairwise Fisher LSD test was used for group comparisons. Significant changes ( $p < 0.05$ ) are in bold.
